# Supplementary material
Source: Springer Nature journal article supplement (https://www.springermedizin.de/resource/supplementary/12884_2013_905_MOESM2_ESM.pdf/9459306)

Probability of survival

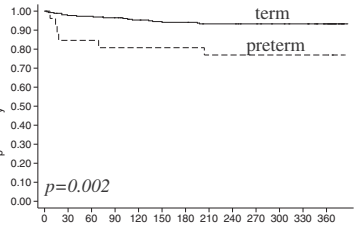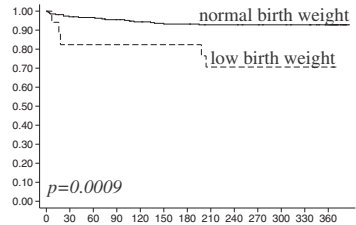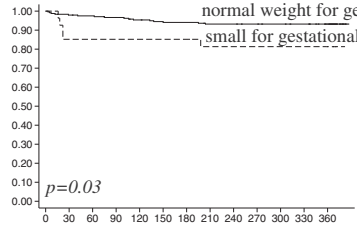

Age in days

Supplement: MOESM2 [file 9459306]
